# Supplementary material for: Worldwide phylogeography and history of wheat genetic diversity
Source: PubMed Central journal article supplement — Sci Adv. 2019 May 29;5(5):eaav0536. doi: 10.1126/sciadv.aav0536 (PMC6541461; doi:10.1126/sciadv.aav0536), 2019-05-29
Supplement: aav0536_SM.pdf [file aav0536_SM.pdf]

## Supplementary Materials for

### Worldwide phylogeography and history of wheat genetic diversity

François Balfourier\*, Sophie Bouchet, Sandra Robert, Romain De Oliveira, H el ene Rimbart, Jonathan Kitt, Fr ed eric Choulet; International Wheat Genome Sequencing Consortium, BreedWheat Consortium, Etienne Paux\*

\*Corresponding author. Email: francois.balfourier@inra.fr (F.B.); etienne.paux@inra.fr (E.P.)

Published 29 May 2019, *Sci. Adv.* **5**, eaav0536 (2019)  
DOI: 10.1126/sciadv.aav0536

#### The PDF file includes:

- Fig. S1. Assignment of 632 landraces to genetic groups.
- Fig. S2. PCoA calculated with 8741 haplotypes on landraces.
- Fig. S3. Isolation by distance.
- Fig. S4. Geographical projection of the frequency of rare alleles and singletons in landraces.
- Fig. S5. Temporal evolution of worldwide genetic diversity.
- Fig. S6. Frequency of major haplotype groups in Europe.
- Fig. S7. Frequency of major haplotype groups in the MED.
- Fig. S8. Frequency of major haplotype groups in Middle East and Central Asia.
- Fig. S9. Frequency of major haplotype groups in South Eastern Asia.
- Fig. S10. Frequency of major haplotype groups in China.
- Fig. S11. Frequency of major haplotype groups in Africa.
- Fig. S12. Frequency of major haplotype groups in America.
- Fig. S13. Frequency of major haplotype groups in the United States.
- Fig. S14. Frequency of major haplotype groups in Oceania.
- Fig. S15. Proportion of the 11 groups among the landraces, traditional cultivars, and modern varieties from different regions of the world.
- Table S1. Description of the eight subpopulations of landraces.
- Table S2. Pairwise comparisons of five subpopulations of landraces westward of the Fertile Crescent.
- Table S3. Pairwise comparisons of five subpopulations of landraces eastward of the Fertile Crescent.
- Table S4. Description of the 11 groups of accessions.
- Table S5. Main SVs (>5 Mb) detected in the wheat genome.
- Legends for data files S1 to S3

#### Other Supplementary Material for this manuscript includes the following:

(available at [advances.sciencemag.org/cgi/content/full/5/5/eaav0536/DC1](https://advances.sciencemag.org/cgi/content/full/5/5/eaav0536/DC1))

Data file S1 (Microsoft Excel format). List of 4506 wheat accessions and related information.

Data file S2 (.zip format). Genotyping data of 4506 wheat accession with 113,457 genome-wide SNPs.

Data file S3 (.zip format). Haplotyping data of 4403 wheat accessions with 8741 haplotypic blocks.

Members of the IWGSC Consortium (Microsoft Word format)

Members of the BreedWheat Consortium (Microsoft Word format)

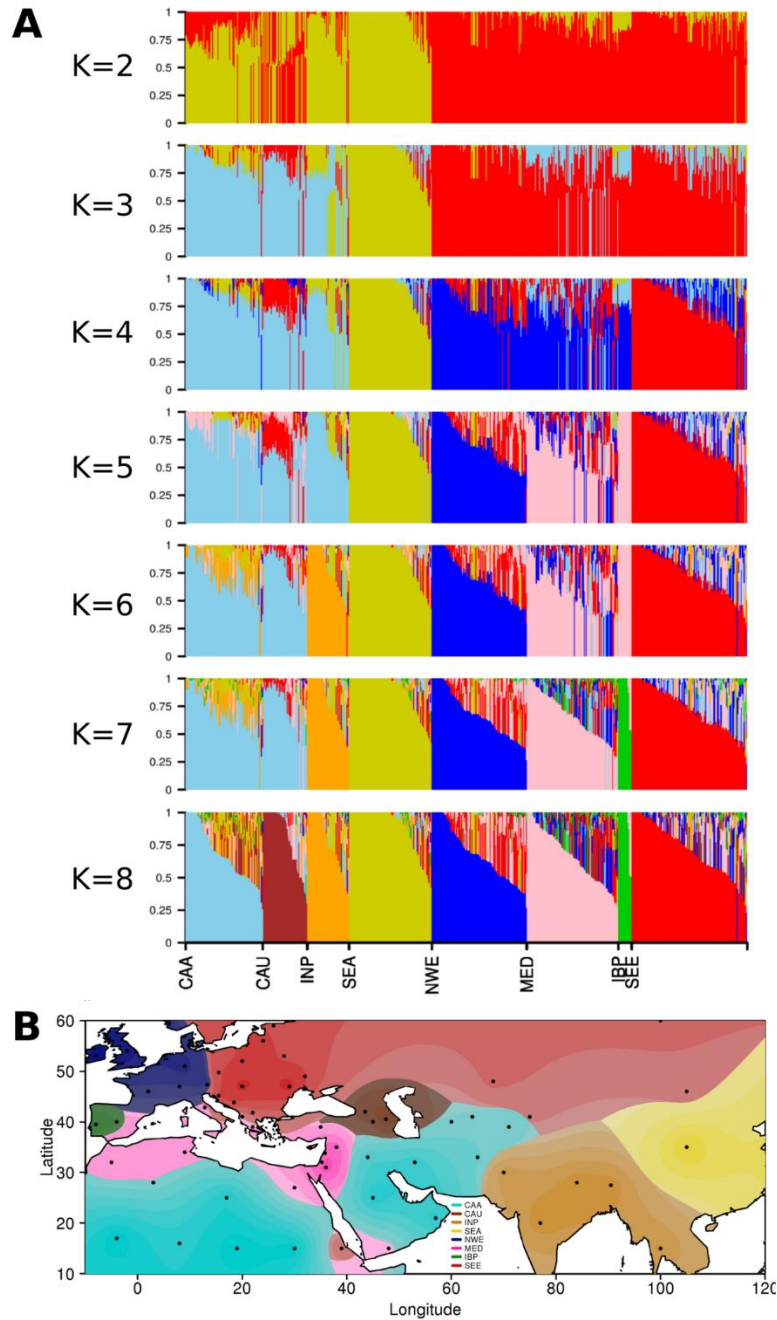

**Fig. S1. Assignment of 632 landraces to genetic groups.** (A) STRUCTURE outputs for K=2 to K=8. (B) Interpolated map representing the structure of wheat landraces (K=8). Cyan: CAA, Brown: CAU, Orange: INP, Yellow: SEA, Blue: NEW, Pink: MED, Green: IBP, Red: SEE.

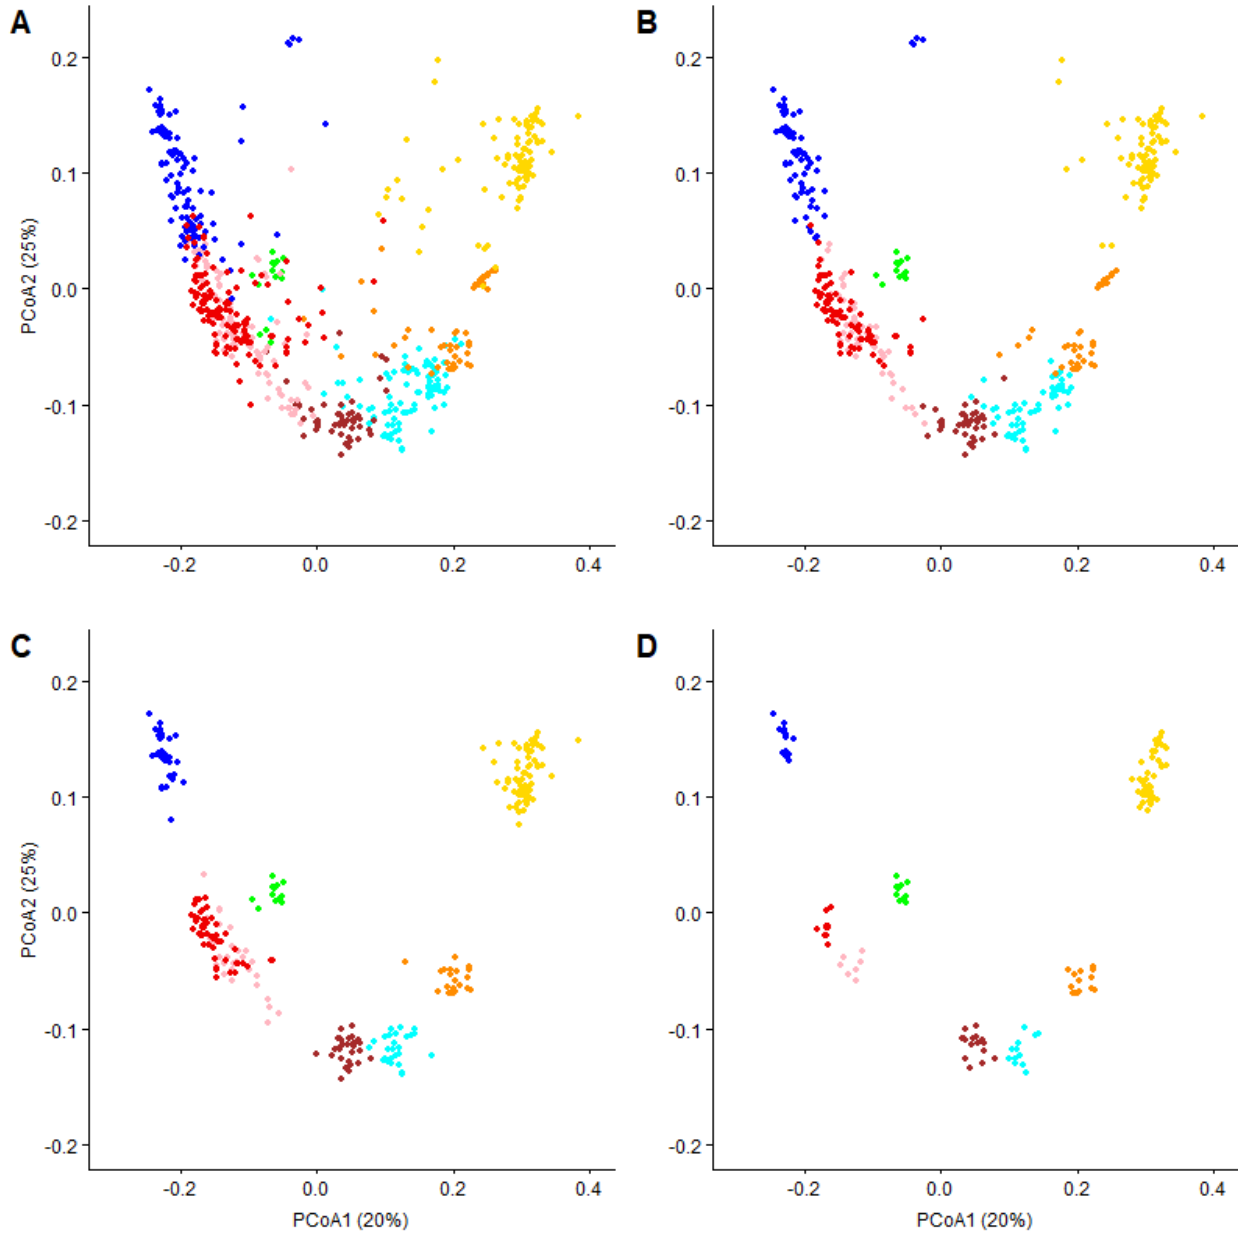

**Fig. S2. PCoA calculated with 8741 haplotypes on landraces.** (A) All landraces. (B) Landraces with assignment  $> 0.6$ . (C) Landraces with assignment  $> 0.8$ . (D) Landraces with assignment  $> 0.99$ . Simple Matching distance was calculated using Darwin software. Cyan: Central Asia & Africa (CAA); Brown: Caucasus (CAU); Orange: Indian Peninsula (INP); Yellow: South-East Asia (SEA); Blue: North West Europe (NWE); Pink: Mediterranean basin (MED); Green: Iberian Peninsula (IBP); Red: South East Europe (SEE).

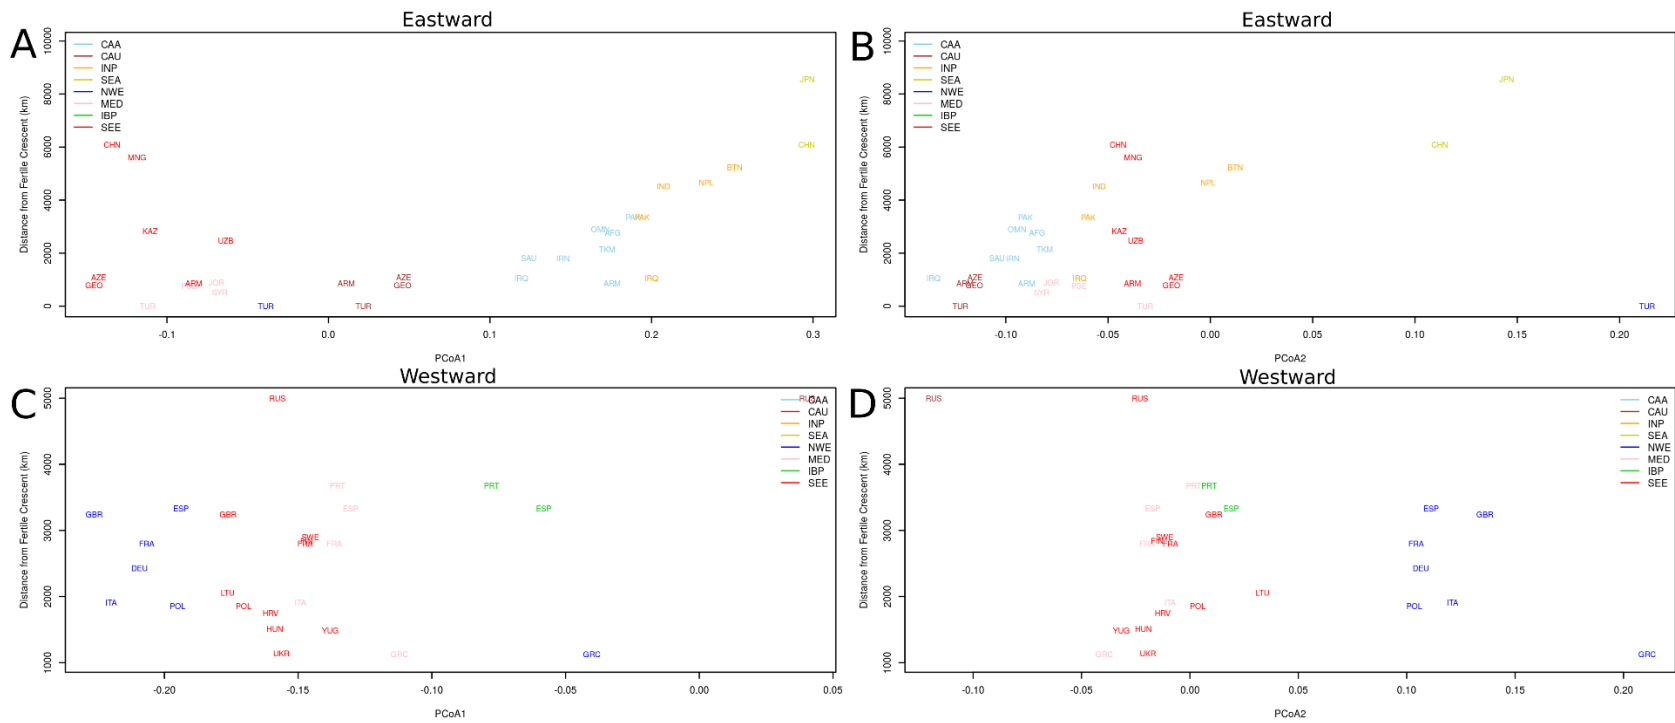

**Fig. S3. Isolation by distance.** (A) Relations between geographical distance from the Fertile Crescent eastward and PCoA1; (B) Relations between geographical distance from the Fertile Crescent eastward and PCoA2; (C) Relations between geographical distance from the Fertile Crescent westward and PCoA1 (PCoA); (D) Relations between geographical distance from the Fertile Crescent eastward and PCoA2.

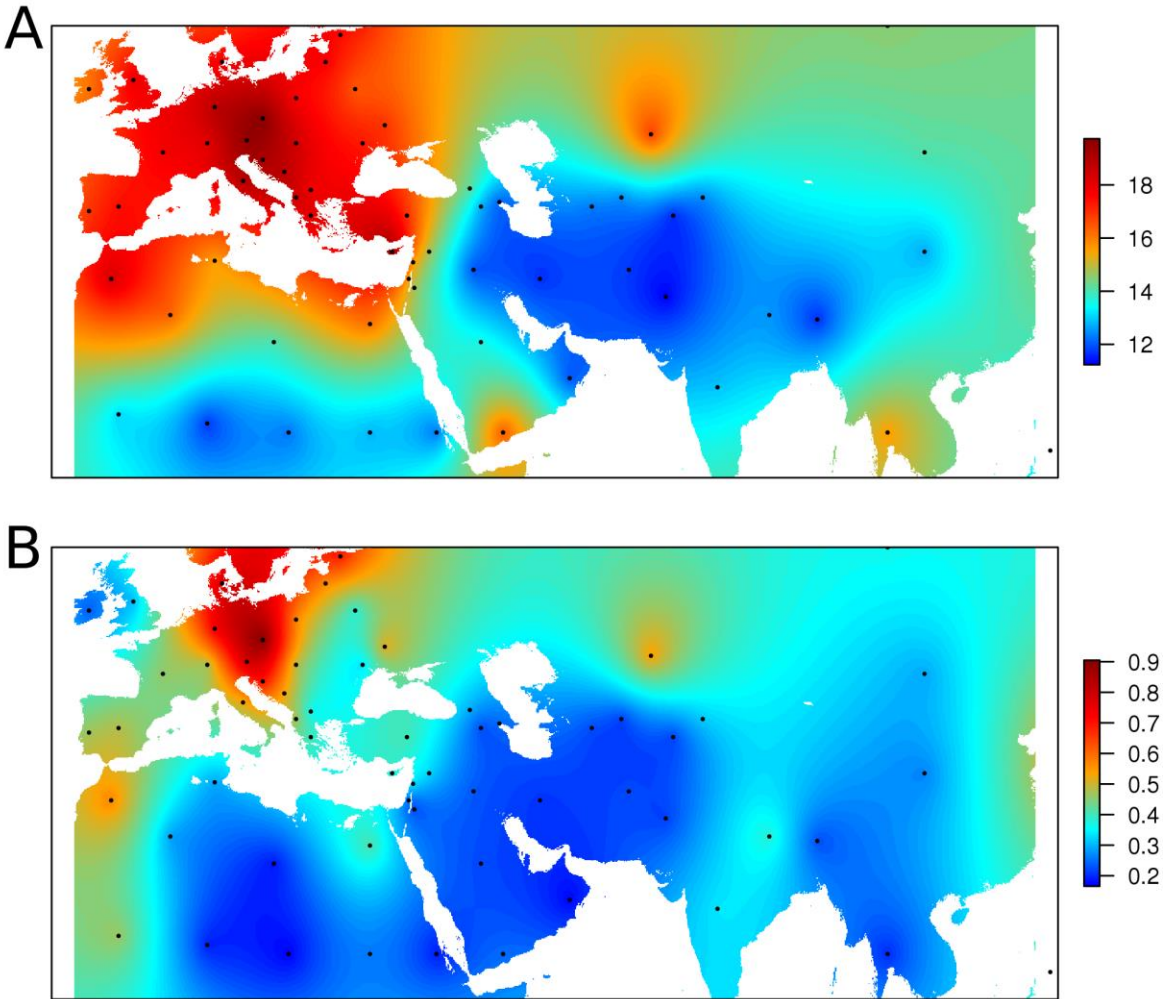

**Fig. S4. Geographical projection of the frequency of rare alleles and singletons in landraces. (A) Rare alleles; (B) singletons.**

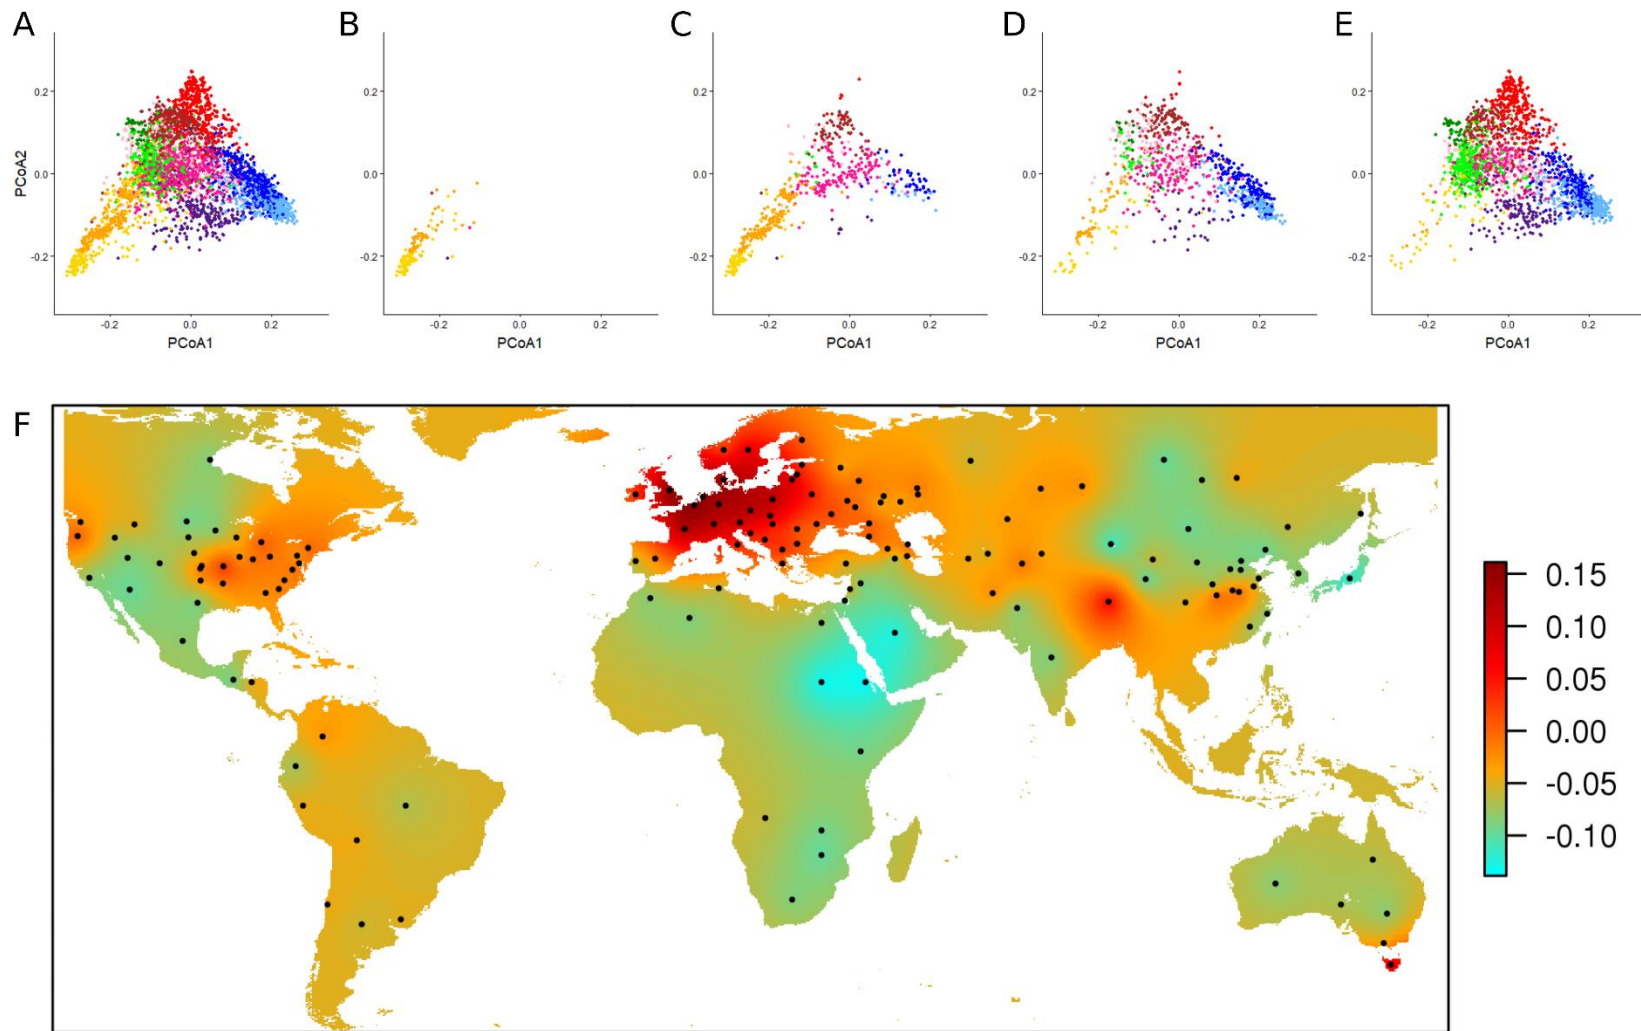

**Fig. S5. Temporal evolution of worldwide genetic diversity.** (A) PCoA calculated with 8741 haplotypes on 4403 accessions. (B) PCoA calculated with 8741 haplotypes on 139 SEA and INP landraces. (C) PCoA calculated with 8741 haplotypes on 632 landraces. (D) PCoA calculated with 8741 haplotypes on 947 traditional cultivars. (E) PCoA calculated with 8741 haplotypes on 2210 modern

varieties. **(F)** Geographical projection of the first axis of the PCoA for modern 2210 varieties. The different colors correspond to the eleven groups.



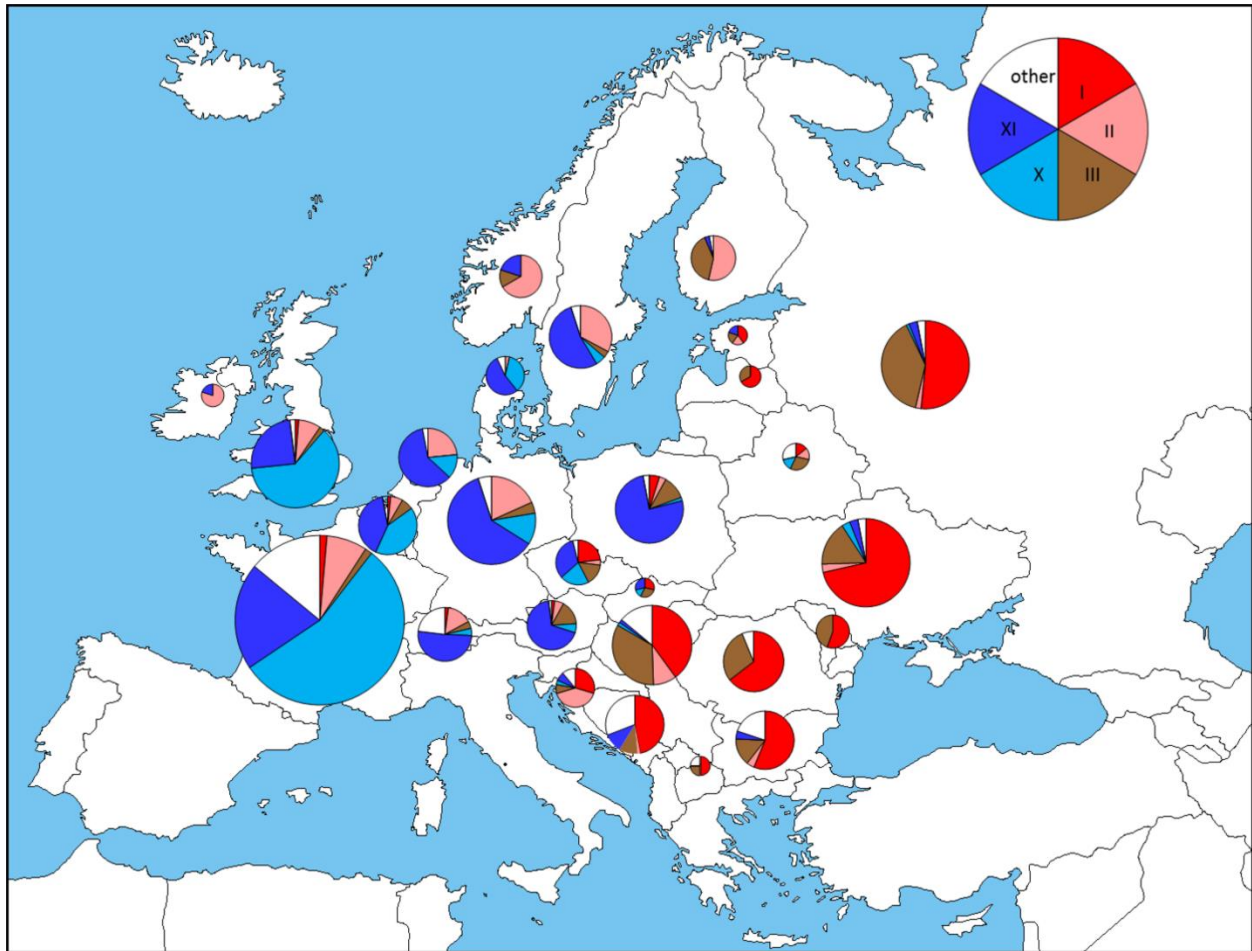

**Fig. S6. Frequency of major haplotype groups in Europe.** The size of a pie is proportional to the number of accessions in each country.

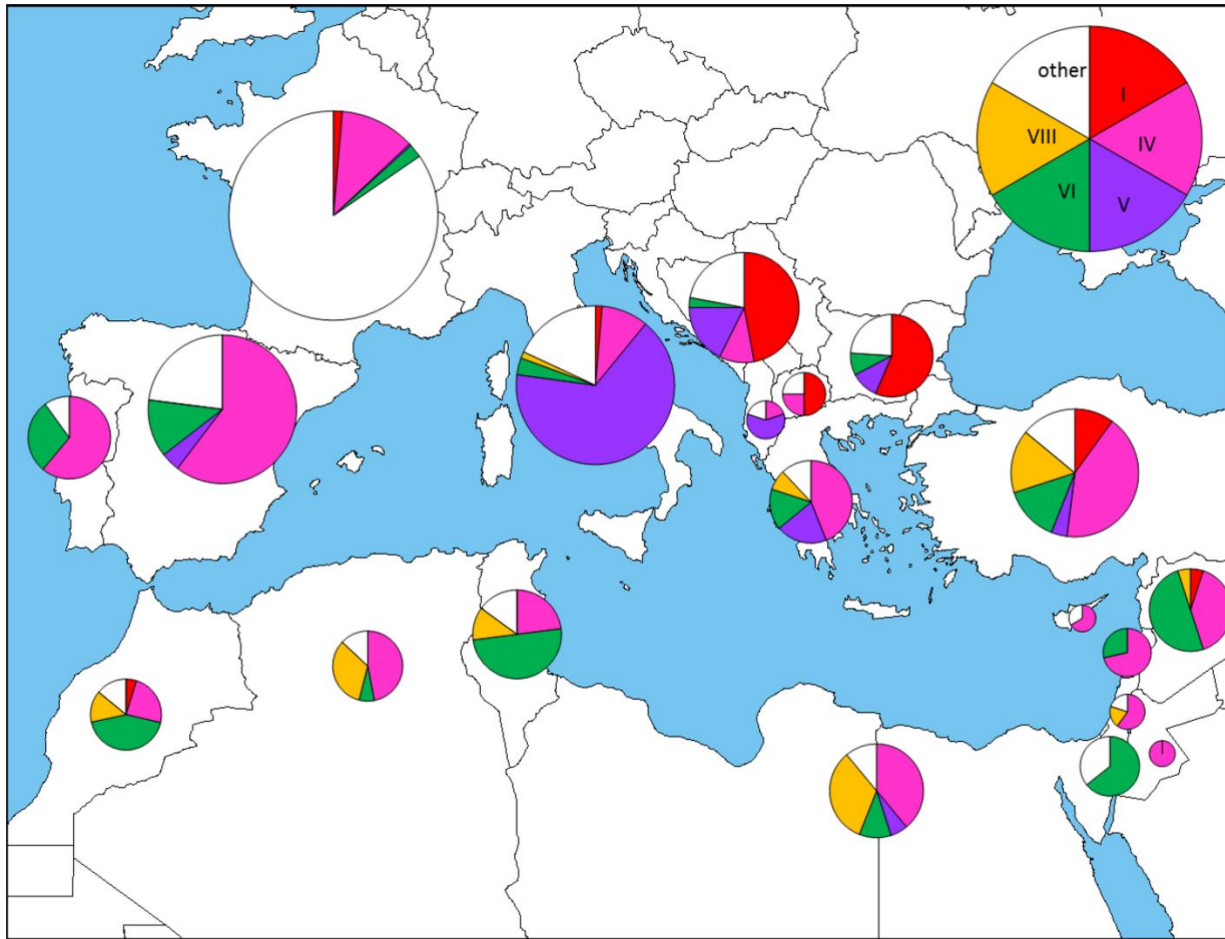

**Fig. S7. Frequency of major haplotype groups in the MED.** The size of a pie is proportional to the number of accessions in each country.

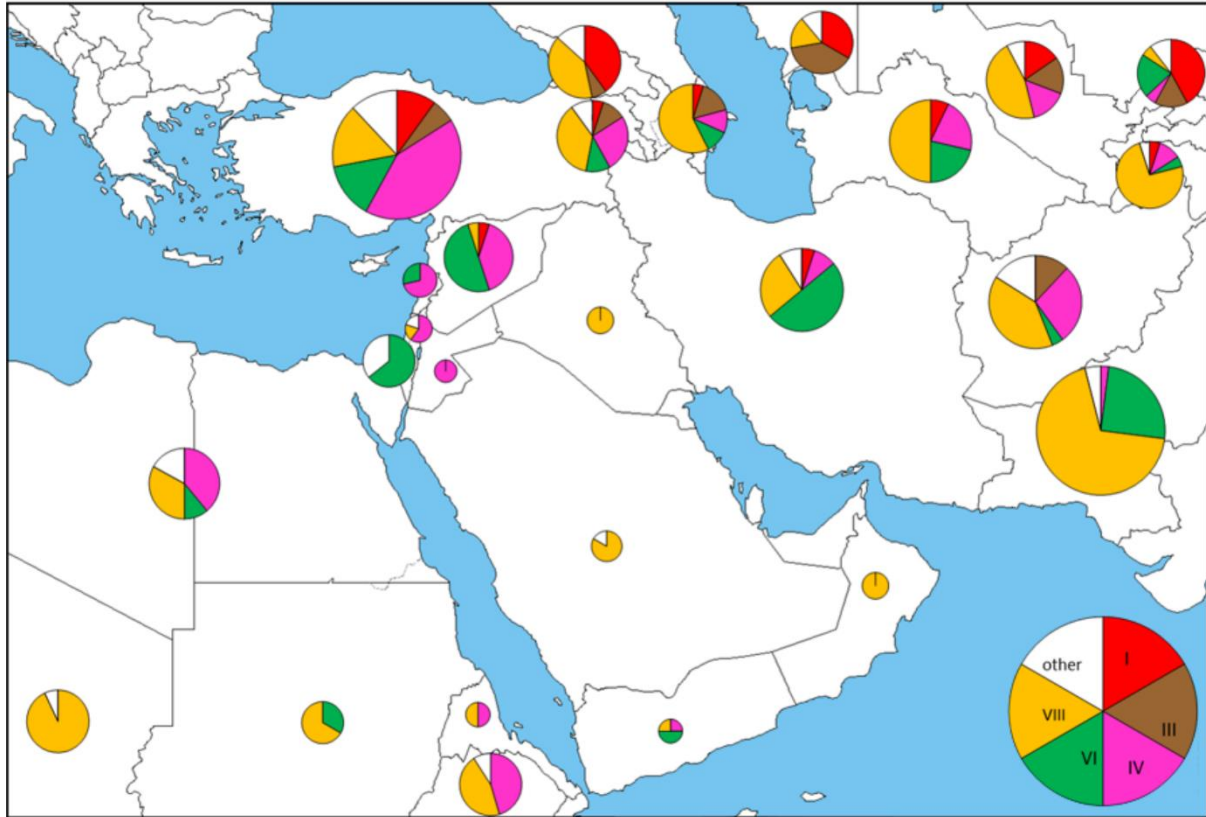

**Fig. S8. Frequency of major haplotype groups in Middle East and Central Asia.** The size of a pie is proportional to the number of accessions in each country.

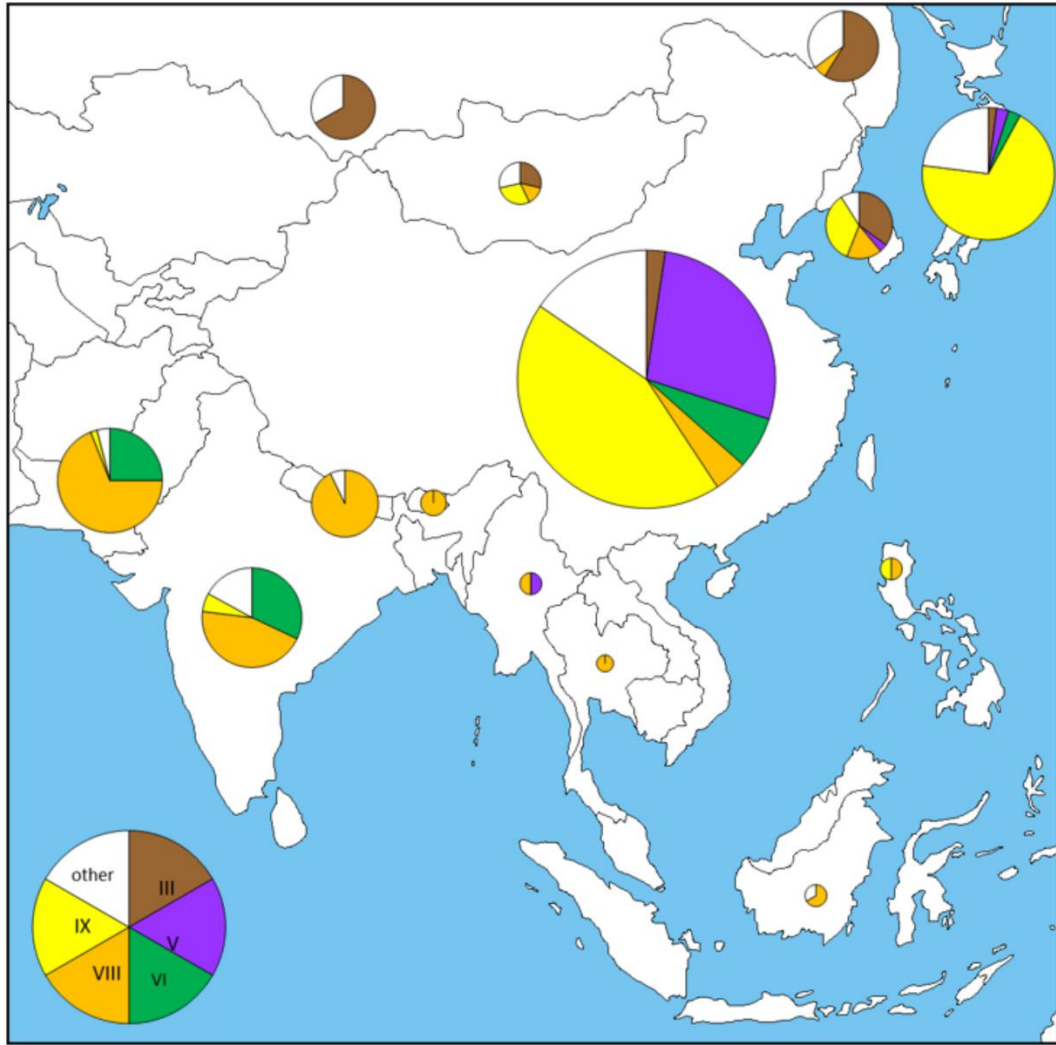

**Fig. S9. Frequency of major haplotype groups in South Eastern Asia.** The size of a pie is proportional to the number of accessions in each country.

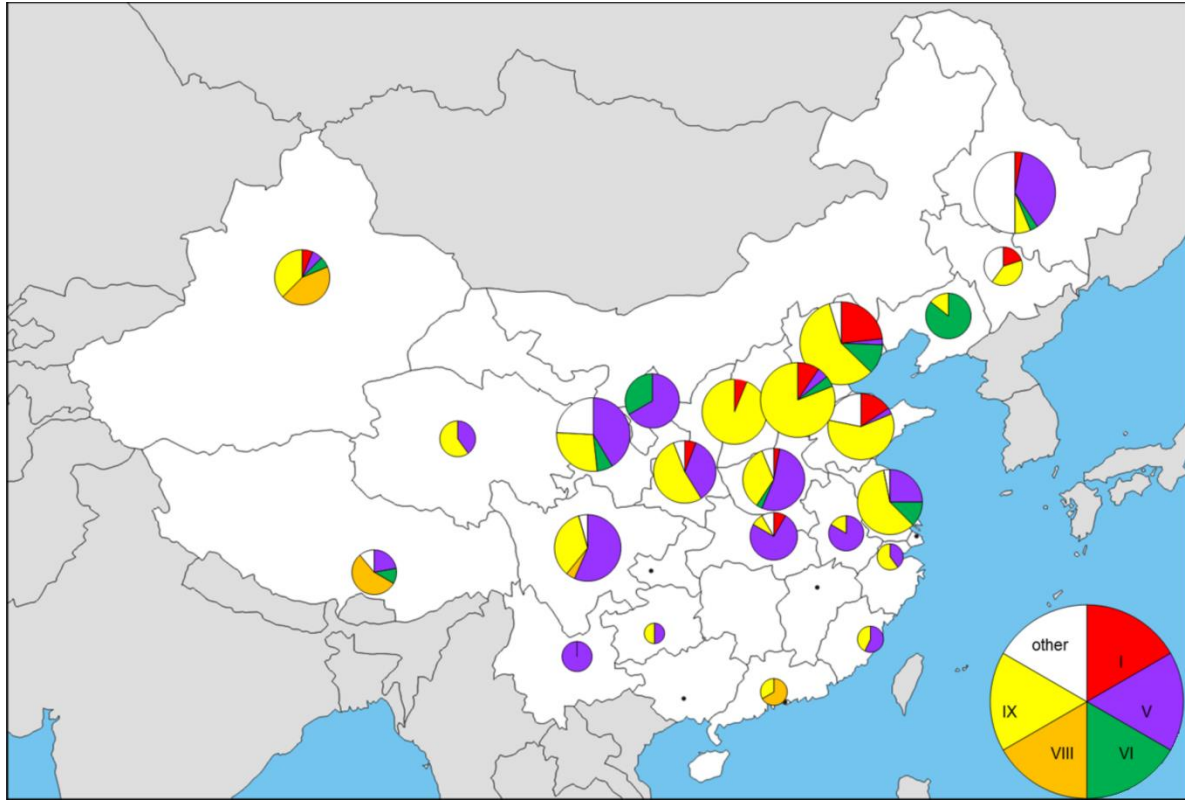

**Fig. S10. Frequency of major haplotype groups in China.** The size of a pie is proportional to the number of accessions in each country.

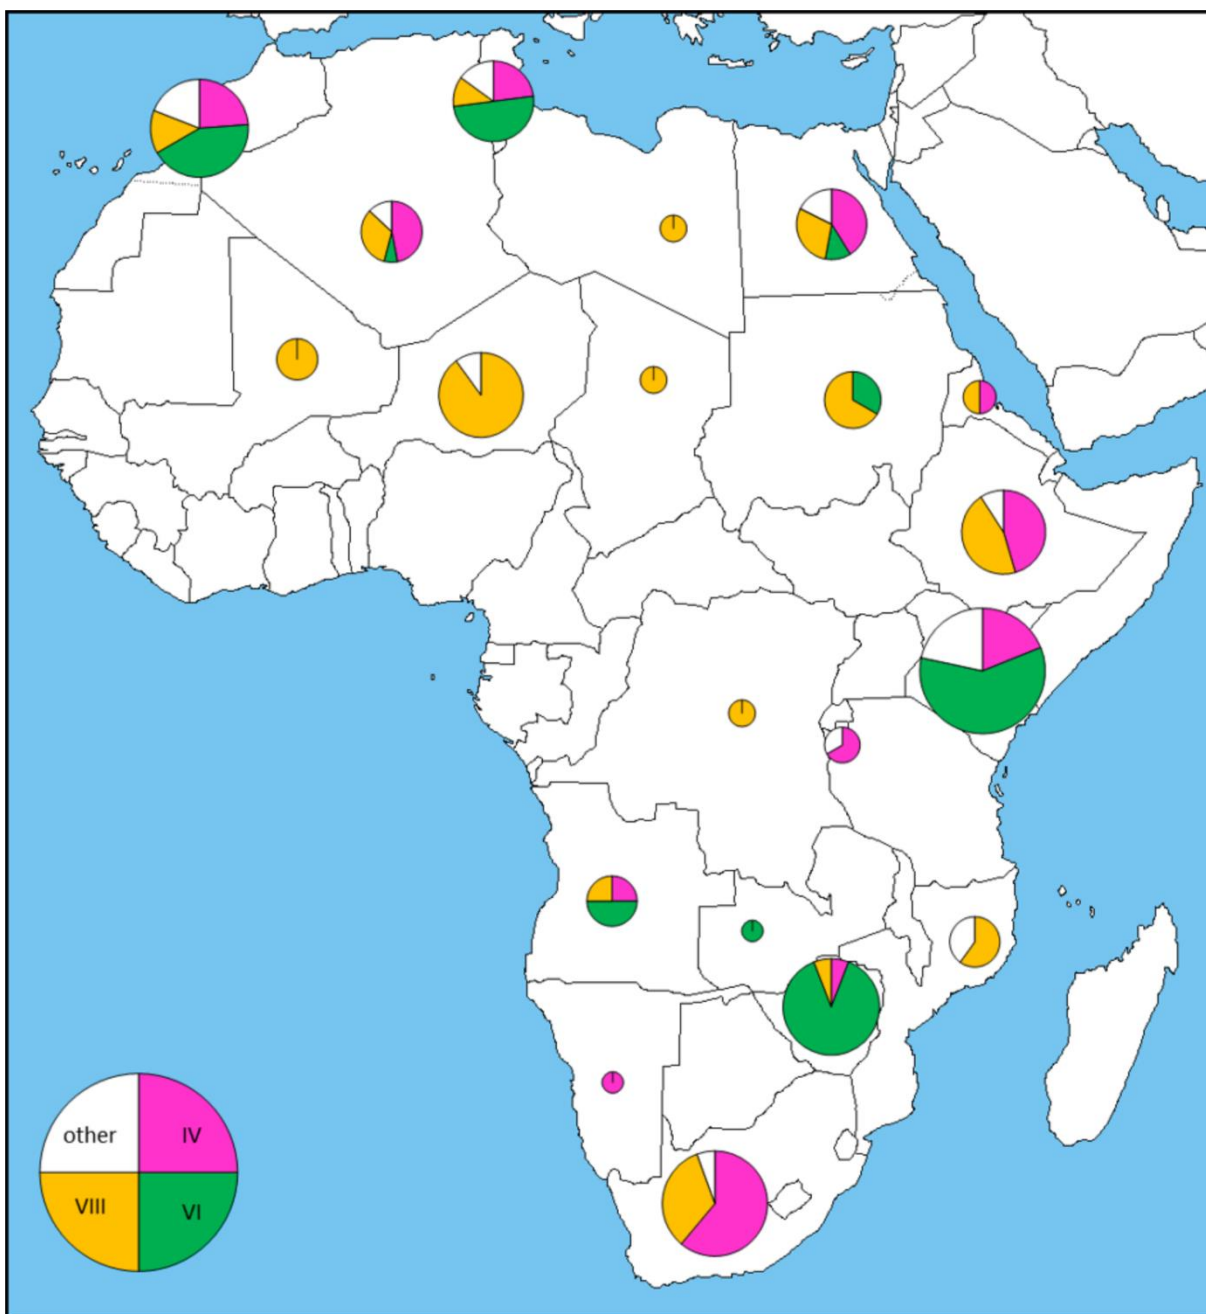

**Fig. S11. Frequency of major haplotype groups in Africa.** The size of a pie is proportional to the number of accessions in each country.

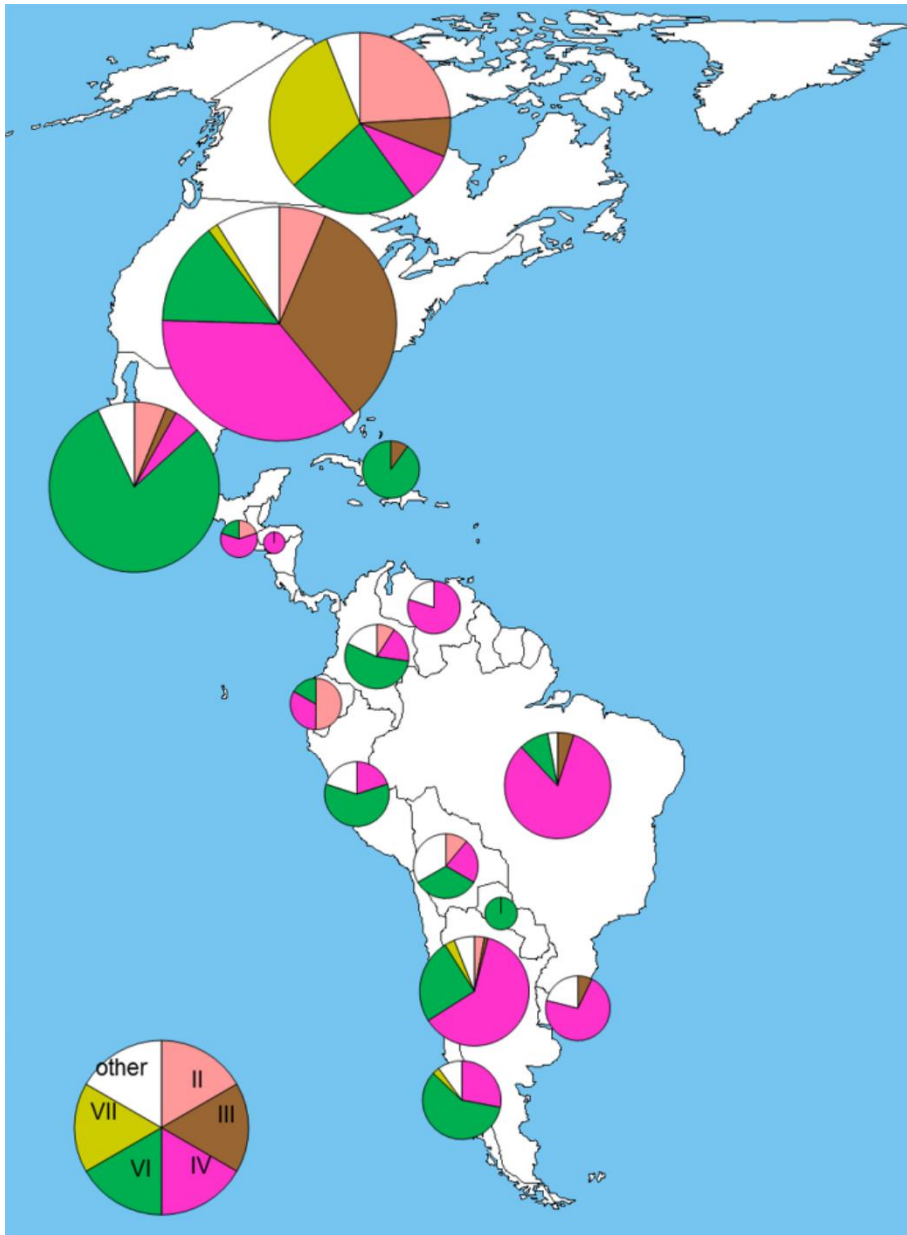

**Fig. S12. Frequency of major haplotype groups in America.** The size of a pie is proportional to the number of accessions in each country.

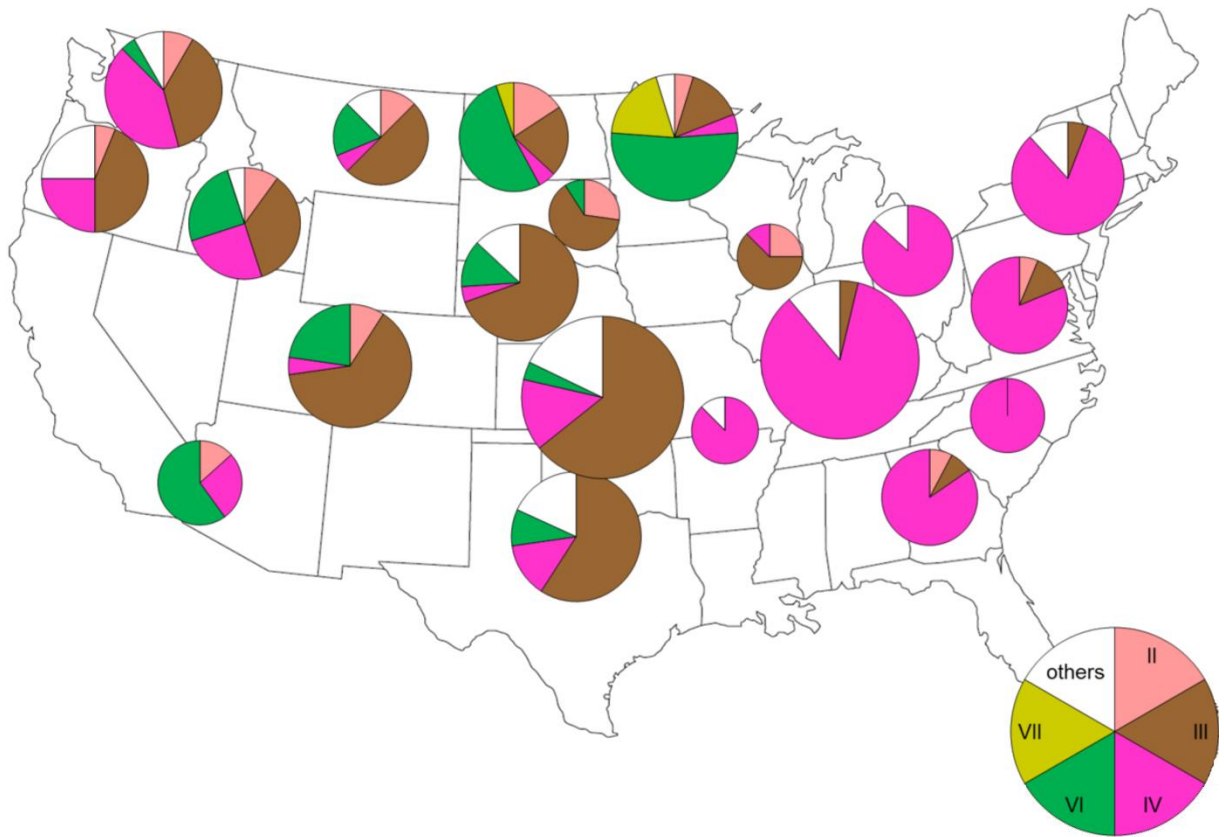

**Fig. S13. Frequency of major haplotype groups in the United States.** The size of a pie is proportional to the number of accessions in each country.



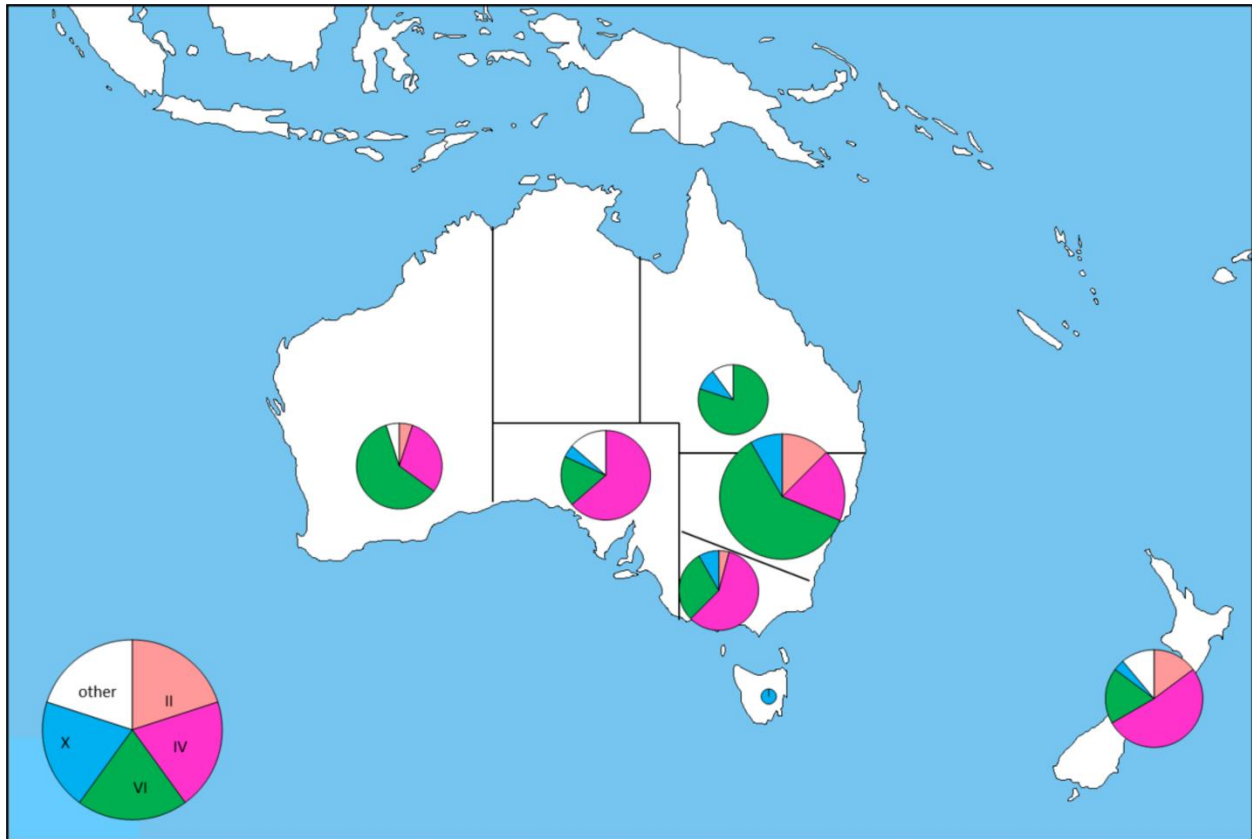

**Fig. S14. Frequency of major haplotype groups in Oceania.** The size of a pie is proportional to the number of accessions in each country.

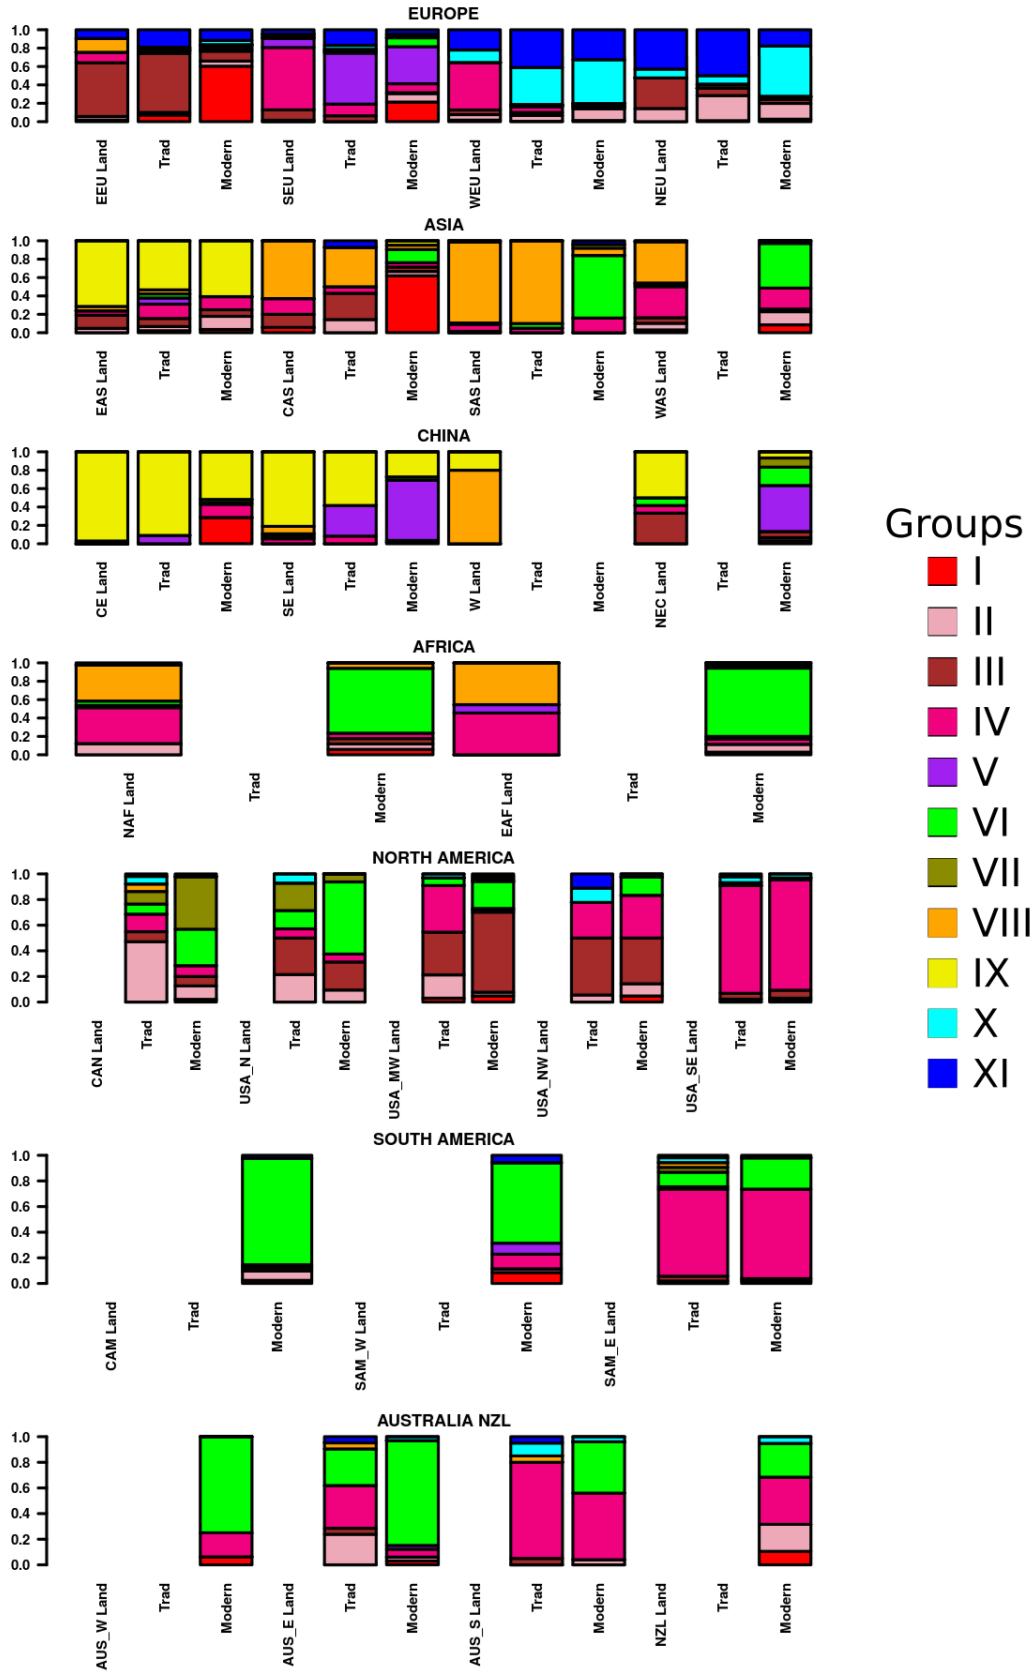

**Fig. S15. Proportion of the 11 groups among the landraces, traditional cultivars, and modern varieties from different regions of the world.**

EUROPE - EEU: Eastern Europe; NEU: Northern Europe; SEU: Southern Europe; WEU: Western Europe

ASIA - CAS: Central Asia; EAS: Eastern Asia; SAS: Southern Asia; WAS: Western Asia

CHINA - SE: South-Eastern; W: Western; NEC: North-Eastern and Central

AFRICA - NAF: Northern Africa; EAF: Eastern Africa

NORTH AMERICA - CAN: Canada; USA\_N: Northern USA; USA\_MW: Mid-Western USA;

USA\_SE: Southern and Eastern USA, USA\_NW: North-Western USA

SOUTH AMERICA - CAM: Central America, SAM\_E: Eastern Coast of Southern America;

SAM\_W: Western Coast of Southern America

ASUTRALIA\_NZL - AUS\_W: Western Coast Australia; AUS\_E: Eastern Coast Australia;

AUS\_S: Southern Coast Australia; NZL: New-Zealand

**Table S1. Description of the eight subpopulations of landraces.**

| Group <sup>a</sup> | N <sup>b</sup> | Assign <sup>c</sup> | Countries <sup>d</sup>                       | Regions <sup>e</sup>                        | Winter <sup>f</sup> | He <sup>g</sup> | Poly Rate <sup>h</sup> | N rare <sup>i</sup> | N sing <sup>j</sup> |
|--------------------|----------------|---------------------|----------------------------------------------|---------------------------------------------|---------------------|-----------------|------------------------|---------------------|---------------------|
| CAA                | 87<br>(54)     | 68 (65)             | OMN (9),SDN (7),SAU (7),PAK (7),IRN (7)      | WAS (30),SAS (22),NAF (20),WAF (11),CAS (9) | 14                  | 0.41            | 0.80                   | 9.33                | 0.2                 |
| CAU                | 50<br>(38)     | 80 (95)             | AZE (24),RUS (19),TUR (16),GEO (14),ARM (11) | WAS (68),EEU (22),SEU (3),SEA (3),EAS (3)   | 35                  | 0.40            | 0.75                   | 8.48                | 0.3                 |
| INP                | 47<br>(36)     | 77 (73)             | IND (28),PAK (25),NPL (22),IRQ (6),EGY (6)   | SAS (83),WAS (6),SEA (6),NAF (6)            | 0                   | 0.35            | 0.71                   | 8.51                | 0.32                |
| SEA                | 93<br>(80)     | 88 (99)             | CHN (85),JPN (10)                            | EAS (98)                                    | 53                  | 0.34            | 0.77                   | 6.75                | 0.17                |
| NWE                | 107<br>(68)    | 68 (66)             | FRA (46),DEU (13),GBR (12),ESP (4),TUR (3)   | WEU (60),NEU (15),SEU (12),EEU (6),WAS (4)  | 84                  | 0.45            | 0.88                   | 20.41               | 0.5                 |
| MED                | 103<br>(59)    | 66 (67)             | SYR (12),FRA (10),ESP (10),ITA (7),TUR (5)   | WAS (29),SEU (27),NAF (17),WEU (10),SAS (3) | 15                  | 0.47            | 0.90                   | 23.09               | 1.9                 |
| IBP                | 15<br>(12)     | 89 (100)            | ESP (75),PRT (25)                            | SEU (100)                                   | 25                  | 0.30            | 0.51                   | 19.6                | 0.53                |
| SEE                | 130<br>(84)    | 71 (71)             | FRA (14),RUS (12),HUN (11),UKR (5),CHN (5)   | EEU (35),WEU (14),WAS (13),NEU (11),SEU (7) | 51                  | 0.44            | 0.92                   | 21.31               | 0.77                |

a Groups of landraces as defined by STRUCTURE algorithm. CAA: Central Asia – Africa; CAU: Caucasus; IBP: Iberian Peninsula; INP: Indian Peninsula; NWE: North Western Europe; MED: Mediterranean region; SEA: South Eastern Asia; SEE: South Eastern Europe

b Number of accessions with highest genome proportion (with at least 60% of its genome ) assigned to this group.

c Mean (median) genome proportion assigned to this group.

d Percentage of accessions originating from each country (International Organization for Standardization code). ARM: Armenia; AZE: Azerbaijan; CHN: China; DEU: Germany; EGY: Egypt; ESP: Spain; FRA: France; GBR: United Kingdom of Great Britain and Northern Ireland; GEO: Georgia; HUN: Hungary; IND: India; IRN: Islamic Republic of Iran; IRQ: Iraq; ITA: Italy; JPN: Japan; NPL: Nepal; OMN:Oman; PAK:Pakistan; PRT: Portugal; RUS: Russian Federation; SAU: Saudi Arabia; SDN: Sudan; SYR: Syrian Arab Republic; TUR: Turkey; UKR: Ukraine

e Percentage of accessions originating from each region (ISO code). CAS: Central Asia; EAS: Eastern Asia; EEU: Eastern Europe; NAF: Northern Africa; NEU: Northern Europe; SAS: Southern Asia; SEA: South-Eastern Asia; SEU: Southern Europe; WAF: Western Africa; WAS: Western Asia; WEU: Western Europe

f Percentage of winter type accessions. Most of other accessions are spring type, a few are alternative type.

|   |                                                           |
|---|-----------------------------------------------------------|
| g | Nei He diversity index                                    |
| h | Percentage of polymorphic alleles                         |
| i | Average number of rare allele (frequency < 0.01) per line |
| j | Average number of singleton per line                      |

**Table S2. Pairwise comparisons of five subpopulations of landraces westward of the Fertile Crescent.**

|     | MED | SEE | NWE | CAU | CAA |
|-----|-----|-----|-----|-----|-----|
| MED | 615 | 271 | 166 | 161 | 242 |
| SEE | 271 | 553 | 197 | 209 | 112 |
| NWE | 166 | 197 | 322 | 43  | 53  |
| CAU | 161 | 209 | 43  | 306 | 235 |
| CAA | 242 | 112 | 53  | 235 | 430 |

Number of rare alleles (frequency<0.05) specific to one genetic group on the diagonal (in blue)

Number of rare alleles shared between populations below and above the diagonal.

**Table S3. Pairwise comparisons of five subpopulations of landraces eastward of the Fertile Crescent.**

|     | MED | SEA | INP | CAU | CAA |
|-----|-----|-----|-----|-----|-----|
| MED | 927 | 173 | 53  | 215 | 244 |
| SEA | 173 | 505 | 179 | 163 | 187 |
| INP | 53  | 179 | 190 | 51  | 80  |
| CAU | 215 | 163 | 51  | 341 | 135 |
| CAA | 244 | 187 | 80  | 135 | 220 |

Number of rare alleles (frequency<0.05) specific to one genetic group on the diagonal (in blue)

Number of rare alleles shared between populations below and above the diagonal.

**Table S4. Description of the 11 groups of accessions.**

| Gp <sup>a</sup> | Name                 | N <sup>b</sup> | Countries <sup>c</sup>                     | Regions <sup>d</sup>                        | Landraces <sup>e</sup>                      | Registration <sup>f</sup> | Modern <sup>g</sup> | Winter <sup>h</sup> | He <sup>i</sup> | Poly <sup>j</sup> |
|-----------------|----------------------|----------------|--------------------------------------------|---------------------------------------------|---------------------------------------------|---------------------------|---------------------|---------------------|-----------------|-------------------|
| I               | SEE_modern           | 413            | UKR (17),HUN (14),RUS (13),YUG (8),ROU (8) | EEU (64),SEU (11),EAS (7),CAS (4),WAS (3)   | SEE (7)                                     | 1984 (1984)               | 95                  | 93                  | 0.39            | 0.95              |
| II              | NWE_NAM              | 353            | FRA (14),CAN (10),DEU (8),USA (7),SWE (5)  | WEU (30),NEU (17),NAM (16),EEU (9),SEU (7)  | SEE (19)                                    | 1962 (1970)               | 66                  | 20                  | 0.47            | 0.97              |
| III             | NAM_SEE              | 419            | USA (28),RUS (14),HUN (12),UKR (4),ROU (3) | EEU (40),NAM (30),WEU (7),NEU (6),EAS (5)   | SEE (69)                                    | 1960 (1965)               | 57                  | 86                  | 0.43            | 0.97              |
| IV              | NW_MED               | 674            | USA (20),FRA (11),ARG (6),AUS (6),ESP (4)  | NAM (22),SAM (15),WEU (14),SEU (12),AUS (8) | IBP (100),MED (100),NWE (9),CAU (8),SEE (5) | 1956 (1962)               | 54                  | 39                  | 0.51            | 0.99              |
| V               | CHN_IT_modern        | 265            | CHN (40),ITA (37),YUG (5),HUN (4),GRC (2)  | SEU (45),EAS (42),EEU (6)                   | NWE (10)                                    | 1967 (1968)               | 81                  | 39                  | 0.45            | 0.94              |
| VI              | CIMMYT_NW_CHN_modern | 528            | MEX (15),AUS (11),USA (10),CAN (6),CHN (5) | NAM (16),CAM (15),AUS (12),SAM (11),SAS (8) | -                                           | 1976 (1977)               | 90                  | 7                   | 0.47            | 0.97              |
| VII             | CAN_CHN_USA_modern   | 63             | CAN (70),CHN (11),USA (8),ARG (3)          | NAM (78),EAS (11),SAM (5)                   | -                                           | 1971 (1974)               | 77                  | 0                   | 0.24            | 0.72              |
| VIII            | SEA_INP              | 292            | PAK (11),NPL (9),IND (8),CHN (5),TJK (5)   | SAS (35),WAS (17),CAS (11),NAF (7),EAS (7)  | INP (100),CAA (100),CAU (92)                | 1938 (1934)               | 16                  | 23                  | 0.44            | 0.91              |
| IX              | CHN_JPN              | 255            | CHN (66),JPN (23),KOR (3)                  | EAS (93)                                    | SEA (98)                                    | 1961 (1965)               | 63                  | 63                  | 0.45            | 0.93              |
| X               | FRA_GBR_modern       | 581            | FRA (62),GBR (17),BEL (4),DEU (3)          | WEU (72),NEU (19),EEU (4)                   | NWE (24)                                    | 1969 (1974)               | 73                  | 90                  | 0.40            | 0.94              |
| XI              | FRA_DEU              | 560            | FRA (24),DEU (16),POL (8),GBR (7),NLD (6)  | WEU (61),NEU (16),EEU (14),SEU (4)          | NWE (56)                                    | 1957 (1964)               | 57                  | 96                  | 0.42            | 0.94              |

a Haplotypic Groups, from I to XI

b Number of accessions

c Percentage of accessions originating from each country (ISO code). ARG: Argentina; AUS: Australia; BEL: Belgium; CAN: Canada; CHN: China; DEU: Germany; ESP: Spain; FRA: France; GBR: United Kingdom of Great Britain and Northern Ireland; GRC: Greece; HUN: Hungary; IND: India; ITA: Italy; JPN: Japan; KOR: Republic of Korea; MEX: Mexico; NLD: Netherlands; NPL: Nepal; PAK: Pakistan; POL: Poland; ROU: Romania; RUS: Russian Federation; SWE: Sweden; TJK: Tajikistan; UKR: Ukraine; USA: United States of America; YUG: Yugoslavia



- d Percentage of accessions originating from each region (ISO code). AUS: Australia and NewZealand; CAM: Central America; CAS: Central Asia; EAS: Eastern Asia; EEU: Eastern Europe; NAF: Northern Africa; NAM: Northern America; NEU: Northern Europe; SAM: South America; SAS: Southern Asia; SEU: Southern Europe; WAS: Western Asia; WEU: Western Europe
- e Percentage of accessions from the eight landrace groups defined by STRUCTURE assigned to this group
- f Mean (Median) registration date
- g Percentage of accessions registered after 1959
- h Percentage of winter type accessions. Most of other accessions are spring type, a few are alternative type
- i Nei He diversity index
- j Percentage of polymorphic alleles

**Table S5. Main SVs (>5 Mb) detected in the wheat genome.**

| Chromosome | Start (Mb) | Stop (Mb) | Size (Mb) | Chromosome length (Mb) | Fraction of the chromosome |
|------------|------------|-----------|-----------|------------------------|----------------------------|
| 1A         | 0          | 214       | 214       | 593                    | 36%                        |
| 1A         | 0          | 28        | 28        | 593                    | 5%                         |
| 1A         | 1          | 22        | 21        | 593                    | 4%                         |
| 1A         | 565        | 593       | 28        | 593                    | 5%                         |
| 1B         | 0          | 689       | 689       | 689                    | 100%                       |
| 1B         | 0          | 236       | 236       | 689                    | 34%                        |
| 1B         | 0          | 218       | 218       | 689                    | 32%                        |
| 1B         | 625        | 689       | 64        | 689                    | 9%                         |
| 1D         | 0          | 12        | 12        | 495                    | 2%                         |
| 1D         | 413        | 418       | 5         | 495                    | 1%                         |
| 1D         | 413        | 424       | 11        | 495                    | 2%                         |
| 2A         | 0          | 10        | 10        | 780                    | 1%                         |
| 2A         | 13         | 19        | 6         | 780                    | 1%                         |
| 2A         | 611        | 780       | 169       | 780                    | 22%                        |
| 2A         | 712        | 780       | 68        | 780                    | 9%                         |
| 2A         | 734        | 780       | 46        | 780                    | 6%                         |
| 2B         | 90         | 757       | 667       | 800                    | 83%                        |
| 2B         | 54         | 733       | 679       | 800                    | 85%                        |
| 2B         | 90         | 609       | 519       | 800                    | 65%                        |
| 2B         | 90         | 154       | 64        | 800                    | 8%                         |
| 2B         | 455        | 733       | 278       | 800                    | 35%                        |
| 2B         | 591        | 768       | 177       | 800                    | 22%                        |
| 2B         | 670        | 743       | 73        | 800                    | 9%                         |
| 2B         | 0          | 30        | 30        | 800                    | 4%                         |
| 2D         | 0          | 18        | 18        | 651                    | 3%                         |
| 2D         | 0          | 46        | 46        | 651                    | 7%                         |
| 2D         | 0          | 457       | 457       | 651                    | 70%                        |
| 2D         | 636        | 651       | 15        | 651                    | 2%                         |
| 3A         | 0          | 41        | 41        | 751                    | 5%                         |
| 3A         | 0          | 19        | 19        | 751                    | 3%                         |
| 3A         | 8          | 14        | 6         | 751                    | 1%                         |
| 3A         | 732        | 751       | 19        | 751                    | 3%                         |
| 3B         | 7          | 14        | 7         | 829                    | 1%                         |
| 3B         | 1          | 33        | 32        | 829                    | 4%                         |
| 3B         | 1          | 6         | 5         | 829                    | 1%                         |
| 3B         | 0          | 123       | 123       | 829                    | 15%                        |
| 3B         | 819        | 829       | 10        | 829                    | 1%                         |

**Table S5. Main SVs (>5 Mb) detected in the wheat genome (Cont.)**

| <b>Chromosome</b> | <b>Start (Mb)</b> | <b>Stop (Mb)</b> | <b>Size (Mb)</b> | <b>Chromosome length (Mb)</b> | <b>Fraction of the chromosome</b> |
|-------------------|-------------------|------------------|------------------|-------------------------------|-----------------------------------|
| 3D                | 504               | 615              | 111              | 615                           | 18%                               |
| 3D                | 600               | 615              | 15               | 615                           | 2%                                |
| 4A                | 640               | 744              | 104              | 744                           | 14%                               |
| 4A                | 725               | 744              | 19               | 744                           | 3%                                |
| 4A                | 642               | 655              | 13               | 744                           | 2%                                |
| 4B                | 640               | 672              | 32               | 672                           | 5%                                |
| 4B                | 656               | 672              | 16               | 672                           | 2%                                |
| 4D                | 0                 | 8                | 8                | 509                           | 2%                                |
| 5A                | 0                 | 31               | 31               | 710                           | 4%                                |
| 5A                | 0                 | 19               | 19               | 710                           | 3%                                |
| 5A                | 464               | 475              | 11               | 710                           | 2%                                |
| 5A                | 534               | 539              | 5                | 710                           | 1%                                |
| 5B                | 533               | 545              | 12               | 713                           | 2%                                |
| 5B                | 486               | 513              | 27               | 713                           | 4%                                |
| 5B                | 507               | 525              | 18               | 713                           | 3%                                |
| 5B                | 588               | 713              | 125              | 713                           | 18%                               |
| 5D                | 501               | 564              | 63               | 565                           | 11%                               |
| 6A                | 306               | 617              | 311              | 617                           | 50%                               |
| 6A                | 0                 | 50               | 50               | 617                           | 8%                                |
| 6A                | 1                 | 20               | 19               | 617                           | 3%                                |
| 6A                | 585               | 617              | 32               | 617                           | 5%                                |
| 6B                | 0                 | 39               | 39               | 721                           | 5%                                |
| 6B                | 0                 | 9                | 9                | 721                           | 1%                                |
| 6B                | 704               | 721              | 17               | 721                           | 2%                                |
| 6D                | 0                 | 7                | 7                | 473                           | 1%                                |
| 6D                | 0                 | 24               | 24               | 473                           | 5%                                |
| 6D                | 456               | 473              | 17               | 473                           | 4%                                |
| 6D                | 462               | 470              | 8                | 473                           | 2%                                |
| 7A                | 0                 | 184              | 184              | 736                           | 25%                               |
| 7A                | 0                 | 30               | 30               | 736                           | 4%                                |
| 7A                | 150               | 162              | 12               | 736                           | 2%                                |
| 7A                | 592               | 736              | 144              | 736                           | 20%                               |
| 7A                | 672               | 736              | 64               | 736                           | 9%                                |
| 7A                | 699               | 736              | 37               | 736                           | 5%                                |

**Table S5. Main SVs (>5 Mb) detected in the wheat genome (Cont.)**

| <b>Chromosome</b> | <b>Start (Mb)</b> | <b>Stop (Mb)</b> | <b>Size (Mb)</b> | <b>Chromosome length (Mb)</b> | <b>Fraction of the chromosome</b> |
|-------------------|-------------------|------------------|------------------|-------------------------------|-----------------------------------|
| 7B                | 0                 | 73               | 73               | 751                           | 10%                               |
| 7B                | 34                | 40               | 6                | 751                           | 1%                                |
| 7B                | 633               | 751              | 118              | 751                           | 16%                               |
| 7B                | 668               | 751              | 83               | 751                           | 11%                               |
| 7B                | 727               | 732              | 5                | 751                           | 1%                                |
| 7B                | 693               | 698              | 5                | 751                           | 1%                                |
| 7B                | 739               | 749              | 10               | 751                           | 1%                                |
| 7D                | 0                 | 10               | 10               | 639                           | 2%                                |
| 7D                | 49                | 59               | 10               | 639                           | 2%                                |
| 7D                | 0                 | 457              | 457              | 639                           | 72%                               |
| 7D                | 375               | 639              | 264              | 639                           | 41%                               |
| 7D                | 563               | 639              | 76               | 639                           | 12%                               |
| 7D                | 612               | 639              | 27               | 639                           | 4%                                |

**Data S1. List of 4506 wheat accessions and related information.**

**Data S2. Genotyping data of 4506 wheat accession with 113,457 genome-wide SNPs.**  
([https://urgi.versailles.inra.fr/download/wheat/genotyping/Balfourier\\_et\\_al\\_Wheat\\_Phylogeography\\_DataS2.zip](https://urgi.versailles.inra.fr/download/wheat/genotyping/Balfourier_et_al_Wheat_Phylogeography_DataS2.zip))

**Data S3. Haplotyping data of 4403 wheat accessions with 8741 haplotypic blocks.**  
([https://urgi.versailles.inra.fr/download/wheat/genotyping/Balfourier\\_et\\_al\\_Wheat\\_Phylogeography\\_DataS3.zip](https://urgi.versailles.inra.fr/download/wheat/genotyping/Balfourier_et_al_Wheat_Phylogeography_DataS3.zip))
